# Supplementary material
Source: PubMed Central journal article supplement (PMC7833912)
Supplement: mmc1.pdf [file mmc1.pdf]

# THE LANCET

## Infectious Diseases

### Supplementary appendix 1

This translation in Chinese was submitted by the authors and we reproduce it as supplied. It has not been peer reviewed. *The Lancet's* editorial processes have only been applied to the original in English, which should serve as reference for this manuscript.

Supplement to: Li F, Li Y-Y, Liu M-J, et al. Household transmission of SARS-CoV-2 and risk factors for susceptibility and infectivity in Wuhan: a retrospective observational study. *Lancet Infect Dis* 2021; published online Jan 18. [https://doi.org/10.1016/S1473-3099\(20\)30981-6](https://doi.org/10.1016/S1473-3099(20)30981-6).

此简体中文译文由作者提交，我方按照提供的版本刊登。此译文并未经过同行审阅。医学期刊《柳叶刀》的编辑流程仅适用于英文原稿，英文原稿应作为此手稿的参考。

## 武汉市新型冠状病毒肺炎疫情在家庭内传播及与易感性、传播力相关危险因素 的回顾性研究

**背景：**武汉是新型冠状病毒肺炎（COVID-19）全球疫情最早的一个爆发中心。本研究旨在探索武汉市新型冠状病毒（SARS-CoV-2）在家庭内的传播特征以及影响病毒传播力和人群易感性的相关因素。

**方法：**本研究是一项回顾性队列研究，针对 2019 年 12 月 2 日至 2020 年 4 月 18 日期间武汉市上报的所有新型冠状病毒肺炎确诊病例（包括实验室确诊病例和临床确诊病例）和无症状感染者的家庭进行分析。家庭的定义包括居住在同一住所的家庭成员；没有居住在一起但和家庭成员存在密切接触的亲属，也被认为来自同一家庭。考虑到不同个体暴露程度的差异性，本研究采用统计传播模型估算了家庭内的二代发病率（secondary attack rates, SAR），并评估了影响 SARS-CoV-2 传播力与人群易感性的因素。此外，通过计算家庭再生数（每个家庭内部一个病例可传染的人数）这一指标对武汉市不同阶段实施的疫情干预政策的效果进行了评估。

**发现：**本研究共纳入 27101 个家庭，包括一代病例 29578 人和家庭密切接触者 57581 例。当将 SARS-CoV-2 的平均潜伏期设为 5 天，最大传染期设为 22 天时，计算出家庭内 SAR 值为 15.6%（95%CI: 15.2-16.0）。与其他年龄人群相比，60 岁以上人群感染 SARS-CoV-2 的风险最高，而 0-1 岁婴儿的易感性又高于 2-5 岁（odds ratio (OR)=2.20, 95%confidence interval (CI): 1.40-3.44）和 6-12 岁儿童（OR=1.53, 95%CI: 1.01-2.34）。当接触时间相同时，儿童和青少年病例（20 岁以下）传染他人的能力是 60 岁及以上人群的 1.58 倍（95%CI: 1.28-1.95）。无症状感染者传染他人的能力远低于有临床症状的确诊病例（OR=0.21, 95%CI: 0.14-0.31），而有症状的确诊病例在发病前（潜伏期）的传播力比发病后更强（OR=1.42, 95%CI: 1.30-1.55）。在严格的疫情干预政策实施后（如隔离病例和密切接触者以及限制出行），一代病例的家庭再生数下降了 52%（从 0.25 [95%CI: 0.24-0.26] 降至 0.12 [95%CI: 0.10-0.13]），继发病例的家庭再生数从 0.17 [95%CI: 0.16-0.18] 降低到了 0.063 [95%CI: 0.057-0.070]，减少了 63%。

**意义：**在家庭内，虽然儿童和青少年对 SARS-CoV-2 的易感性较老年人群弱，但

其传播力更强。无症状感染者的传播力低于有临床症状的病例，而有临床症状的病例在潜伏期内比症状出现后更具传染性。本研究的发现对于制定新冠病毒肺炎疫情的控制措施具有重要指导意义，例如当情况允许时，可及时为符合条件的儿童进行新型冠状病毒疫苗的接种。
